# Supplementary material for: Requirements for a successful Enhanced Recovery After Surgery (ERAS) program: a multicenter international survey among ERAS nurses
Source: Springer Nature journal article supplement (doi:10.1007/s10353-021-00698-9), 2021-03-17
Supplement: MOESM1 [file 18978080]

## Survey

Q1. What is your gender

Male

Female

Q2. Your age:

Scroll-down menu: 20-90

Q3. Country you currently work in:

Scroll-down menu: include all country implemented

Q4. The hospital you are currently working in is :

National ERAS center of Excellence

ERAS center

Not yet implemented ERAS center

Other (please specify)

Q5. Your current position: (multiple choice)

ERAS dedicated nurse

ERAS coordinator

Data manager

Nurse

other: please specify

Q6. Your activity is dedicated as follows

full time ERAS

part time ERAS – part time clinic

part time ERAS – part time research activity

full time clinic

other: please specify

Q7. Percentage of your working time dedicated to ERAS

0

<20 %

20- <40 %

40 - <60%

60 - <80 %

80 - <100%

100 %

Q8. For how many years have you been working for ERAS?

Scroll-down menu: 1-30

Q9. What are/were your **motivations in joining** ERAS program? (choose the most important one's (up to 4))

Improve patient outcomes

Patient satisfaction

Reduce cost

Reduce workload

- Attractive job
- New challenge
- Academics opportunity
- Multidisciplinary team work
- No particular motivations
- Other : please specify

Q10. In your opinion, what is the success of the ERAS program in your center (0=total failure, 5= neutral, 10=total success)?

0 – total failure → 10 – total success

Q11. What are/were the most important **barriers to the implementation** of ERAS (choose max 3)?

- Time
- Nurses
- Surgeons
- Money
- Logistics
- Patients
- Administrative workload
- Insufficient support from expert centres
- other : please specify

Q12. How difficult was it for you to **implement** ERAS in your institution?

0 – Not difficult → 10 – Very difficult

Q13. How important is the staff education **before implementing** ERAS program?

0 – Not important → 10 – Very important

Q14. In your opinion, how important is the staff education **after implementing** ERAS program?

0 – Not important → 10 – Very important

Q15. How difficult is it for you to **maintain** ERAS in your institution?

0 – Not difficult → 10 – Very difficult

Q16. Who is the ERAS coordinator in your center?

Surgeon

Anesthetist

ERAS nurse

Administrator

Other : please specify

Q17. What is the importance of an ERAS coordinator in each center?

0 – Not important → 10 – Very important

Q18. In your opinion, what should be the attributions of an ERAS **nurse**? (multiple choice)

patient pre-OP education

Visiting the patient during hospitalization

patient follow-up after discharge

data entry in EIAS database

Teaching and local team management

Q19. What is the frequency of ERAS meetings (ERAS nurses, surgeons, anaesthesiologists) within your institution?

Once a week

Once a month

Every 6 months

Never

other: please specify

Q20. What is the frequency of ERAS training for **nurses** within your institution?

Once a week

Once a month

Once every 6 months

Never

other: please specify

Q21. What is the frequency of ERAS training for **doctors** within your institution?

Once a week

Once a month

Once every 6 months

Never

other: please specify

Q22. In your opinion, what should be discussed during those ERAS meetings?

Number of patients included within evaluation periode.

Compliance rate

Clinical outcomes (complications, hospital length of stay)

Problems in day-to-day clinic (weight, fluids balance, mobilisation)

Research if data correctly validated (audit)

other: please specify

Q23. How long does your ERAS meeting last?

15 minutes

30 minutes

45 minutes

1 hour

1 hour 30 minutes

2 hours

2 hours 30 minutes

Other (please specify)

Q24. How important would you consider meetings in a regular basis for ERAS dedicated nurses of your country/region?

0 – Not important → 10 – Very important

Q 25. How important would you consider monitoring / mentoring visit from your national center of excellence?

0 – Not important → 10 – Very important

Q26. How would you perceive an external audit in your department?

Willingness to improve data entry and accuracy

Invading your "private sphere"

Waist of time

good opportunity to ask questions

good opportunity to refresh

Other: please specify

Q27. How difficult is it to find complications in your Patient Medical Record (PMR)?

0 - Very easily → 10-Impossible

Q28. On what document do you base your complications coding and grading ?

letter of discharge

doctors daily notes

daily visit in the ward and discussion with nurses / doctors

other : please specify

Q29. What would be your proposition to make ERAS program sustainable on long-term?

Free text
